# Supplementary material
Source: publisher site journal article supplement (https://static.cambridge.org/content/id/urn:cambridge.org:id:article:S1049023X19004370/resource/name/S1049023X19004370supp001.docx)
Supplement: Supplementary file 1 [file S1049023X19004370supp001.docx]

**Interview Guide**

**Injuries in disaster relief workers and mitigation strategies**

Interview questions are based on the research questions and include the type of injuries, their causes and mitigating strategies. The questions are asked to participants one-to-one, either through phone or skype interview whichever is convenient to the participants. The aim is to identify various possible injuries, factors that they consider contribute to injury amongst relief works and to identify ways in which those injuries may be reduced (mitigation strategies). Participants are also asked to comment on (and/or validate) the proposed framework of themes developed from the literature. The principal questions are listed below while other sub-questions may be developed as the conversation progresses.

**Questions**

**Opening statement:** Firstly, I would like to thank you for your voluntary participation in this interview which is actually a part of partial fulfilment of the award of a Master of Public Health degree at Queensland University of Technology for the unit Dissertation. I assure you that your views from the interview will be exclusively used for the purpose as mentioned in the information sheet and your identity will not be disclosed in any part of the report. The information you provide will be extracted as a general expert’s opinion and will not affect your personal and professional reputation. If you have any queries related to this matter, please feel free to ask before we start the actual interview questions. With this, I would also like to request permission to record the conversation so that it can be re-listened for data analysis and interpretation purposes.

**Topic 1. Types of Injuries**

1. What could be the possible injuries for disaster responders in different phases of relief works?
2. In your opinion, how are these injuries different from each other?
3. Do you see any connection among the injury types that you have just mentioned?

**Topic 2. Factors affecting the injury rate**

1. Based on your field experience and knowledge, what could be the factors that potentiates the injury rate?
2. How do you see the trend of international volunteerism? Do you think international volunteers are more susceptible to injuries?
3. What is your idea and thoughts behind scarcity of epidemiological data relating to injuries of relief workers?

**Topic 3. Mitigation approaches**

1. Would you like to talk about some special considerations to be made in order to minimize the hazard rate?
2. In your opinion, are there any measures that could ensure worker’s safety prior, during or after deployment?
3. How can we create a favourable and sustainable engagement for professionals and altruists in disaster relief works?

**Topic 4. Conceptual framework**

1. Finally we have developed this conceptual framework form the literature and appreciate your view as to whether this captures the relationship between the injuries and the factors that cause them.
2. Is there anything you would like to add to the framework?

**Closing question**: Thank you so much for arranging some time from your busy schedule for the conversation and sharing your valuable opinion. Well, we are almost at the end of the interview. So, before we conclude the conversation, is there anything you would like to add or bring up related to the topic?
